# Supplementary material for: SAT-Hadoop-Processor: A Distributed Remote Sensing Big Data Processing Software for Earth Observation Applications
Source: MDPI journal article supplement (doi:10.3390/app112210610), 2021-11-11
Supplement: s1 [file s1]

**Table S1.** The used HDFS commands

| ID | Operation                       | Command                                   |
|----|---------------------------------|-------------------------------------------|
| 1  | Creation of the HDFS folder     | hadoop fs -mkdir /user/root/SATDATA       |
| 2  | Enlist the HDFS files in folder | hdfs dfs -ls /user/root/SATDATA           |
| 3  | Copy CSV file into HDFS         | hadoop fs -put CH4.csv /user/root/SATDATA |
| 4  | HDFS file visualization         | hadoop fs -cat /user/root/SATDATA/CH4.csv |

**Table S2.** The used HBase commands

| ID | Operation                                                           | Command                                                                                                                                                                                                                                                                                                                                                        |
|----|---------------------------------------------------------------------|----------------------------------------------------------------------------------------------------------------------------------------------------------------------------------------------------------------------------------------------------------------------------------------------------------------------------------------------------------------|
| 5  | Start the HBase shell                                               | Hbase shell                                                                                                                                                                                                                                                                                                                                                    |
| 6  | Create an HBase table                                               | CREATE 'Table_CH4','DT','GL','LV';                                                                                                                                                                                                                                                                                                                             |
| 7  | Display all the tables                                              | List<br>hbase org.apache.hadoop.hbase.mapreduce.ImportTsv<br>-DIMPORTTSV.SEPARATOR=';-DIMPORTTSV.CO                                                                                                                                                                                                                                                            |
| 8  | Import an HDFS inside HBase table (Example of CH <sub>4</sub> file) | UMNS="HBASE_ROW_KEY, DT:EpochTime, DT:Y, DT:M, DT:D, DT:H, DT:Min, GL:Latitude, GL: Longitude, LV: LevelGround, LV: Level0, LV: Level1, LV: Level2, LV: Level3, LV: Level4, LV: Level5, LV: Level6, LV: Level7, LV: Level8, LV: Level9, LV: Level10, LV: Level11, LV: Level12, LV:Total_column"<br>Table2_CH4 hdfs://192.168.11.200:/user/root/SATDATA/CH4.csv |
| 9  | Disable a table                                                     | disable 'Table_CH4'                                                                                                                                                                                                                                                                                                                                            |
| 10 | Remove a table                                                      | drop 'Table_CH4'                                                                                                                                                                                                                                                                                                                                               |
| 11 | Show the HBase table                                                | scan 'Table_CH4'                                                                                                                                                                                                                                                                                                                                               |
| 12 | Get the first column                                                | get 'Table_CH4', 'Row1'                                                                                                                                                                                                                                                                                                                                        |

**Table S3.** The used Hive commands

| ID | Operation                                                            | Command                                                                                                                                                                                                                                                                                                                                                                                                                                                                                                                                                                                                                                                                                                                                                                                                                    |
|----|----------------------------------------------------------------------|----------------------------------------------------------------------------------------------------------------------------------------------------------------------------------------------------------------------------------------------------------------------------------------------------------------------------------------------------------------------------------------------------------------------------------------------------------------------------------------------------------------------------------------------------------------------------------------------------------------------------------------------------------------------------------------------------------------------------------------------------------------------------------------------------------------------------|
| 13 | Creation of the database1                                            | CREATE DATABASE IF NOT EXISTS database1 LOCATION '/user/root' WITH DBPROPERTIES ('CREATEDBY'=semlali, 'CREATEDFOR'= database1');                                                                                                                                                                                                                                                                                                                                                                                                                                                                                                                                                                                                                                                                                           |
| 14 | View details of the database1                                        | DESCRIBE DATABASE EXTENDED database1;                                                                                                                                                                                                                                                                                                                                                                                                                                                                                                                                                                                                                                                                                                                                                                                      |
| 15 | Enlist the databases                                                 | SHOW databases;                                                                                                                                                                                                                                                                                                                                                                                                                                                                                                                                                                                                                                                                                                                                                                                                            |
| 16 | Enlist the tables                                                    | SHOW tables;<br>CREATE EXTERNAL TABLE table_ch4_hive<br>(key STRING, epochtime STRING, y BIGINT, m BIGINT, d BIGINT, h BIGINT, min BIGINT, latitude FLOAT, longitude FLOAT, levelground FLOAT, level0 FLOAT, level1 FLOAT, level2 FLOAT, level3 FLOAT, level4 FLOAT, level5 FLOAT, level6 FLOAT, level7 FLOAT, level8 FLOAT, level9 FLOAT, level10 FLOAT, level11 FLOAT, level12 FLOAT, total_column FLOAT) STORED BY 'org.apache.hadoop.hive.hbase.hbasestoragehandler' WITH SERDEPROPERTIES ("hbase.columns.mapping" =":key, epochtime, y, m, d, h, min, latitude, longitude, levelground, level0, level1, level2, level3, level4, level5, level6, level7, level8, level9, level10, level11, level12, total_column")<br>TBLPROPERTIES ("hbase.table.name" = "table_ch4", "hbase.mapred.output.outputtable"="table_ch4"); |
| 17 | Import an HBase table inside Hive (Example of CH <sub>4</sub> files) | CREATE EXTERNAL TABLE Table_CH4_HDFS Key STRING, EpochTime BIGINT, Y BIGINT, M BIGINT, D BIGINT, H BIGINT, Min BIGINT, Latitude FLOAT, Longitude FLOAT, LevelGround FLOAT, Level0 FLOAT, Level1 FLOAT, Level2 FLOAT, Level3 FLOAT, Level4 FLOAT, Level5 FLOAT, Level6 FLOAT, Level7 FLOAT, Level8 FLOAT, Level9 FLOAT, Level10 FLOAT, Level11 FLOAT,                                                                                                                                                                                                                                                                                                                                                                                                                                                                       |
| 18 | Import an HDFS file inside Hive (Example of CH <sub>4</sub> file)    |                                                                                                                                                                                                                                                                                                                                                                                                                                                                                                                                                                                                                                                                                                                                                                                                                            |

Level12 FLOAT, Total\_column FLOAT) ROW FORMAT DELIMITED FIELDS  
TERMINATED BY ';' STORED AS TEXTFILE LOCATION '/user/root/SATDATA';

Select top 10 rows of the

19 Hive table sorted by epoch      SELECT \* FROM table\_ch4\_hive SORT BY epochtime DESC LIMIT 10  
time

---
